# Supplementary material
Source: PubMed Central journal article supplement (PMC1409726)
Supplement: 7601023s2.pdf [file 7601023s2.pdf]

| Focus             |                     | Name                                 | Web                                                                                                                                                                                                                                         | Reference                                                                                     |                      |
|-------------------|---------------------|--------------------------------------|---------------------------------------------------------------------------------------------------------------------------------------------------------------------------------------------------------------------------------------------|-----------------------------------------------------------------------------------------------|----------------------|
| <b>Coding</b>     |                     | Human transcript database            | <a href="http://www.hgsc.bcm.tmc.edu/HTDB/">http://www.hgsc.bcm.tmc.edu/HTDB/</a>                                                                                                                                                           | Human Genome Sequencing Center at Baylor College of Medicine                                  |                      |
|                   |                     | GGEN Database                        | <a href="http://sciencepark.mdanderson.org/ggeg/search.htm">http://sciencepark.mdanderson.org/ggeg/search.htm</a>                                                                                                                           | MD Anderson Cancer Center at the University of Texas                                          |                      |
|                   |                     | AltSplice, AltExtron, AltDb          | <a href="http://www.ebi.ac.uk/asd/">http://www.ebi.ac.uk/asd/</a>                                                                                                                                                                           | Thanaraj et al. 2004, Clark et al. 2002                                                       |                      |
|                   |                     | FAST DB                              | <a href="http://193.48.40.18/fastdb/">http://193.48.40.18/fastdb/</a>                                                                                                                                                                       | De la Grange 2005                                                                             |                      |
|                   |                     | Hollywood Database                   | <a href="http://hollywood.mit.edu/">http://hollywood.mit.edu/</a>                                                                                                                                                                           | Holste et al. 2006                                                                            |                      |
| <b>Non-coding</b> | General             | Noncoding RNAs Database              | <a href="http://biobases.ibch.poznan.pl/ncRNA/">http://biobases.ibch.poznan.pl/ncRNA/</a>                                                                                                                                                   | Institute of Bioorganic Chemistry, Polish Academy of Sciences                                 |                      |
|                   |                     | Database of ncRNAs in plants         | <a href="http://www.prl.msu.edu/PLANTncRNAs/">http://www.prl.msu.edu/PLANTncRNAs/</a>                                                                                                                                                       | Michigan State University                                                                     |                      |
|                   |                     | RFAM                                 | <a href="http://www.sanger.ac.uk/Software/Rfam/">http://www.sanger.ac.uk/Software/Rfam/</a>                                                                                                                                                 | Griffiths-Jones et al. 2005, Griffiths-Jones et al. 2003                                      |                      |
|                   |                     | RNADB                                | <a href="http://research.imb.uq.edu.au/rnadb/">http://research.imb.uq.edu.au/rnadb/</a>                                                                                                                                                     | Pang et al. 2005                                                                              |                      |
|                   |                     | Noncode                              | <a href="http://noncode.bioinfo.org.cn/">http://noncode.bioinfo.org.cn/</a>                                                                                                                                                                 | Bioinformatics Research Group, Institute of Computing Technology, Chinese Academy of Sciences |                      |
|                   | MicroRNAs           | MicroRNADB                           | <a href="http://166.111.30.65/micronadb/">http://166.111.30.65/micronadb/</a>                                                                                                                                                               | Laboratory of Bioinformatics, Tsinghua University                                             |                      |
|                   | RNase P             | The RNase P database                 | <a href="http://jwbrown.mbio.ncsu.edu/RNaseP/home.html">http://jwbrown.mbio.ncsu.edu/RNaseP/home.html</a>                                                                                                                                   | Brown et al. 1999                                                                             |                      |
|                   | SRP RNAs            | Signal Recognition Particle Database | <a href="http://psyche.uthct.edu/dbs/SRPDB/SRPDB.html">http://psyche.uthct.edu/dbs/SRPDB/SRPDB.html</a>                                                                                                                                     | Alm Rosenblad et al. 2003                                                                     |                      |
|                   | Ribosomal RNAs      | 5S Ribosomal RNA database            | <a href="http://www.man.poznan.pl/SSData/">http://www.man.poznan.pl/SSData/</a>                                                                                                                                                             | Szymanski et al. 2002                                                                         |                      |
|                   |                     | Ribosomal Database Project-II        | <a href="http://rdp.cme.msu.edu/">http://rdp.cme.msu.edu/</a>                                                                                                                                                                               | Cole et al. 2005                                                                              |                      |
|                   |                     | European ribosomal RNA database      | <a href="http://www.psb.ugent.be/rRNA/">http://www.psb.ugent.be/rRNA/</a>                                                                                                                                                                   | University of Gent                                                                            |                      |
|                   | tRNAs               | tRNA sequences                       | <a href="http://www.uni-bayreuth.de/departments/biochemie/trna/">http://www.uni-bayreuth.de/departments/biochemie/trna/</a>                                                                                                                 | Sprinzi and Vassilenko                                                                        |                      |
|                   |                     | GtRDB                                | <a href="http://rna.wustl.edu/tRNADB">http://rna.wustl.edu/tRNADB</a>                                                                                                                                                                       | Lowe 2002                                                                                     |                      |
|                   | Small RNAs          | Small RNA database                   | <a href="http://condor.bcm.tmc.edu/smallRNA/">http://condor.bcm.tmc.edu/smallRNA/</a>                                                                                                                                                       | Department of Pharmacology, Baylor College of Medicine                                        |                      |
|                   | snoRNAs             | snoRNAs from Yeast Database          | <a href="http://www.bio.umass.edu/biochem/rna-sequence/Yeast_snoRNA_Database/snoRNA_DataBase.html">http://www.bio.umass.edu/biochem/rna-sequence/Yeast_snoRNA_Database/snoRNA_DataBase.html</a>                                             | Samarsky and Fournier 1999                                                                    |                      |
|                   |                     | snoRNA Database                      | <a href="http://lowelab.ucsc.edu/snoRNADB/">http://lowelab.ucsc.edu/snoRNADB/</a>                                                                                                                                                           | USCS RNA Center                                                                               |                      |
|                   | Introns             | YIDP                                 | <a href="http://www-db.embl-heidelberg.de/jss/servlet/de.embl.bk.wwwTools.GroupLeftEMBL/ExternalInfo/seraphin/yidb.html">http://www-db.embl-heidelberg.de/jss/servlet/de.embl.bk.wwwTools.GroupLeftEMBL/ExternalInfo/seraphin/yidb.html</a> | Lopez and Seraphin 2000                                                                       |                      |
|                   | <b>Modification</b> |                                      | The RNA modification Database                                                                                                                                                                                                               | <a href="http://medlib.med.utah.edu/RNAmods/">http://medlib.med.utah.edu/RNAmods/</a>         | Limbach et al. 1994  |
|                   | <b>Structure</b>    |                                      | RNABase                                                                                                                                                                                                                                     | <a href="http://www.rnabase.org/">http://www.rnabase.org/</a>                                 | Murthy and Rose 2003 |

## **Supplementary online Table Mendes Soares & Valcárcel**

**Table 1. Summary of databases and other computational resources describing the transcriptome of higher eukaryotes.** References: Alm Rosenblad M, Gorodkin J, Knudsen B, Zwieb C, Samuelsson T (2003) SRPDB (Signal Recognition Particle Database). *Nucl Acids Res* **31 (Database Issue)**: 363-364; Brown JW (1999) The Ribonuclease P Database. *Nucl Acids Res* **27**: 314; Clark F, Thanaraj TA (2002) Categorization and characterization of transcript-confirmed constitutively and alternatively spliced introns and exons from human. *Hum Mol Genet* **11**: 451-464; Cole JR, Chai B, Farris RJ, Wang Q, Kulam SA, McGarrell DM, Garrity GM, Tiedje JM (2005) The Ribosomal Database Project (RDP-II): sequences and tools for high-throughput rRNA analysis. *Nucl Acids Res* **33(Database Issue)**: D294-D296; de la Grange P, Dutertre M, Martin N, Auboeuf D (2005) FAST DB: a website resource for the study of the expression regulation of human gene products. *Nucl Acids Res* **33(13)**: 4276-4284; Griffiths-Jones S, Bateman A, Marshall M, Khanna A, Eddy SR (2003) Rfam: an RNA family database. *Nucl Acids Res* **33(1)**: 439-441; Griffiths-Jones S, Moxon S, Marshall M, Khanna A, Eddy SR, Bateman A (2005) Rfam: annotating non-coding RNAs in complete genomes. *Nucl Acids Res* **33**: D121-D124; Holste D, Huo G, Tung V, Burge CB (2006) HOLLYWOOD: a comparative relational database of alternative splicing. *Nucl Acids Res* 2006 **34 (Database issue)**: D56-62; Limbach PA, Crain PF, McCloskey JA (1994) The modified nucleosides of RNA. *Nucl Acids Res* **22**: 2183-2196; Lopez PJ, Seraphin B (2000) YIDB: the Yeast Intron DataBase. *Nucl Acids Res* **28(1)**: 85-6; Lowe TM, Eddy SR (1997) tRNAscan-SE: A program for improved detection of transfer RNA genes in genomic sequence. *Nucl Acids Res* **25**: 955-964; Murthy VL, Rose GD (2003) RNABase: an annotated database of RNA structures. *Nucl Acids Res* **31(1)**: 502-504; Pang KC, Stephen S, Engstrom PG, Tajul-Arifin K, Chen W, Wahlestedt C, Lenhard B, Hayashizaki Y, Mattick JS (2005) RNAdb - a comprehensive mammalian noncoding RNA database. *Nucl Acids Res* **33 (Database Issue)**: D125-D130; Samarsky DA, Fournier MJ (1999) A comprehensive database for the small nucleolar RNAs from *Saccharomyces cerevisiae*. *Nucl Acids Res* **27(1)**: 161-4; Sprinzl M, Vassilenko KS (2005) Compilation of tRNA sequences and sequences of tRNA genes. *Nucl Acids Res* **33(Database issue)**: D139-40; Szymanski M, Barciszewska MZ, Erdmann VA, Barciszewski J (2002) 5S ribosomal RNA database. *Nucl Acids Res* **30**: 176-178; Thanaraj TA, Stamm S, Clark F, Riethoven JJM, Le Texier V, Muilu J (2004) ASD: the Alternative Splicing Database. *Nucl Acids Res* **32**: D64-D69
